# Supplementary material for: Engineering an efficient and tight d-amino acid-inducible gene expression system in Rhodosporidium/Rhodotorula species
Source: PubMed Central journal article supplement (PMC4624585; doi:10.1186/s12934-015-0357-7), 2015-10-26
Supplement: 12934_2015_357_MOESM2_ESM.pdf [file 12934_2015_357_MOESM2_ESM.pdf]

**a**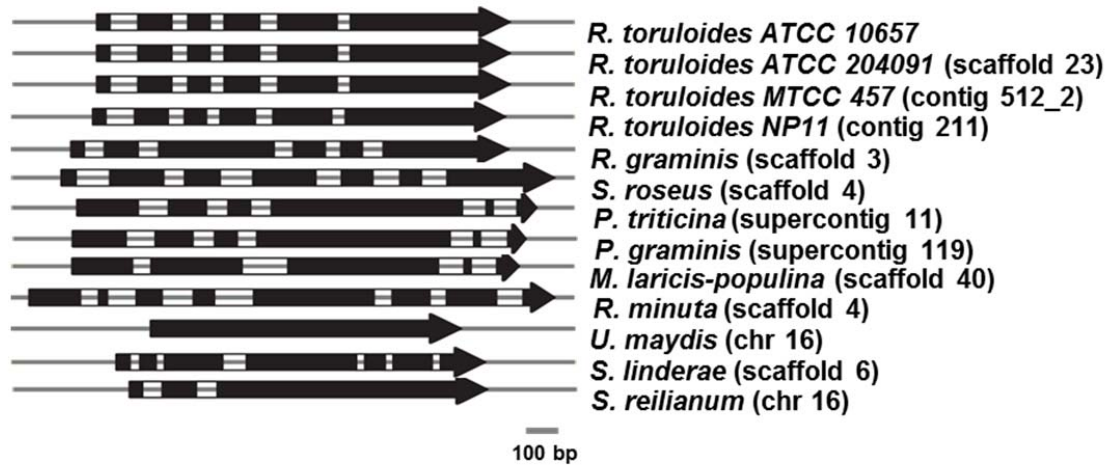**b**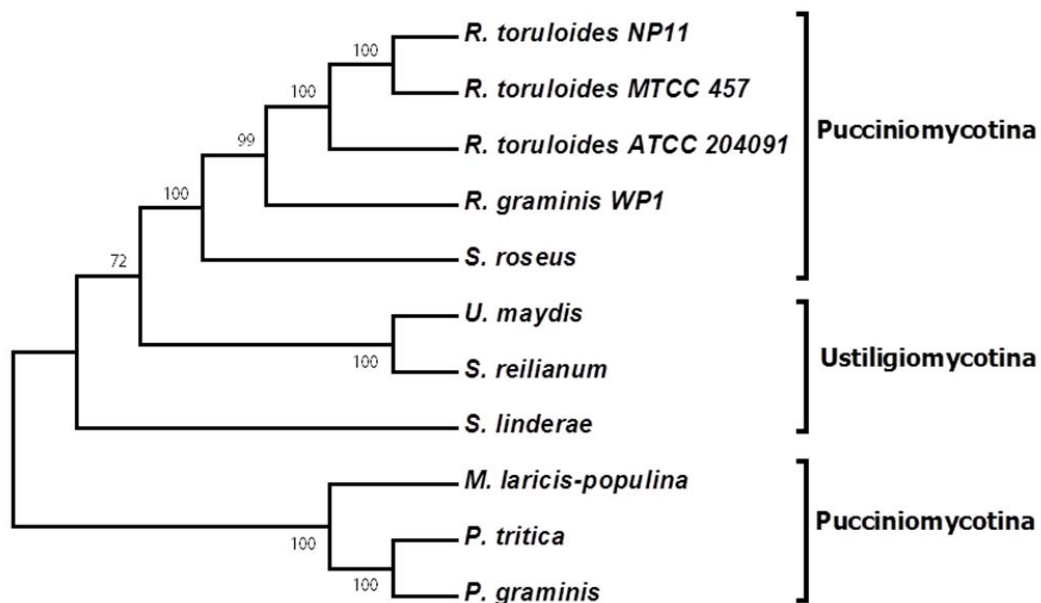

**Additional file 2. Basidiomycetous *DAO1* genes and phylogenetic analysis of their proteins.** (a) Schematic diagrams of *DAO1* genes from *Pucciniomycotina* and *Ustiligiomycotina* subphyla. Introns are shown in white bars. (b) Phylogenetic tree analysis of putative D-amino acid oxidases from *Pucciniomycotina* and *Ustiligiomycotina* subphyla. The phylogenetic tree was constructed by MEGA version 6 program (<http://www.megasoftware.net/>) using Neighbor-Joining algorithm and tested by Bootstrapping. The *DAO1* sequences are listed in GenBank under accession numbers KR183638-183695.
