# Supplementary material for: Engineering an efficient and tight d-amino acid-inducible gene expression system in Rhodosporidium/Rhodotorula species
Source: PubMed Central journal article supplement (PMC4624585; doi:10.1186/s12934-015-0357-7), 2015-10-26
Supplement: 12934_2015_357_MOESM3_ESM.pdf [file 12934_2015_357_MOESM3_ESM.pdf]

**a**

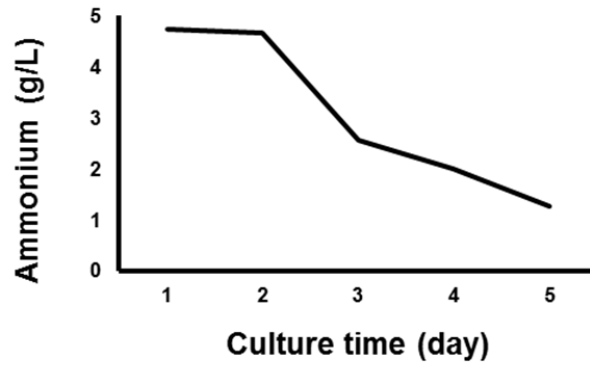

**b**

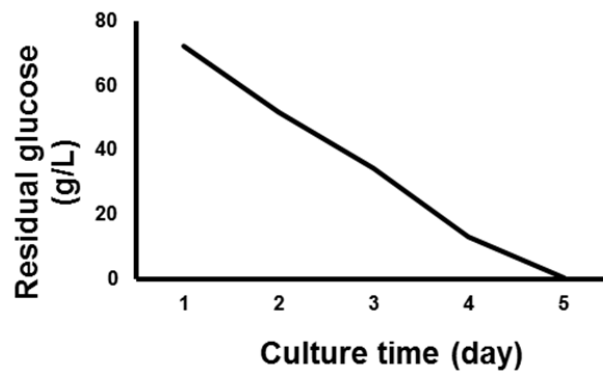

**Additional file 3. Residual carbon and nitrogen sources during lipid accumulation.** *R. toruloides* was cultured in the lipid accumulation medium Y4 with some modifications [23] for 5 days. (a) Residual ammonium concentration in cell culture. (b) Residual glucose concentration in cell culture.
