# Supplementary material for: Engineering an efficient and tight d-amino acid-inducible gene expression system in Rhodosporidium/Rhodotorula species
Source: PubMed Central journal article supplement (PMC4624585; doi:10.1186/s12934-015-0357-7), 2015-10-26
Supplement: 12934_2015_357_MOESM4_ESM.pdf [file 12934_2015_357_MOESM4_ESM.pdf]

**Additional file 4. Codon usage in *R. toruloides* DAO1**

|                  |                |                  |            |   |     |            |   |     |            |   |     |
|------------------|----------------|------------------|------------|---|-----|------------|---|-----|------------|---|-----|
| TTA <sup>a</sup> | L <sup>b</sup> | 0.3 <sup>c</sup> | TCA        | S | 0.5 | TAA        | - | 0.0 | TGA        | - | 0.0 |
| <b>TTC</b>       | F              | 1.9              | TCC        | S | 2.2 | <b>TAC</b> | Y | 2.4 | <b>TGC</b> | C | 1.4 |
| TTG              | L              | 1.6              | <b>TCG</b> | S | 3.0 | <b>TAG</b> | - | 0.3 | TGG        | W | 2.2 |
| TTT              | F              | 0.3              | TCT        | S | 0.8 | TAT        | Y | 0.5 | TGT        | C | 0.3 |
| CTA              | L              | 0.0              | CCA        | P | 1.1 | CAA        | Q | 0.8 | CGA        | R | 1.4 |
| <b>CTC</b>       | L              | 5.1              | <b>CCC</b> | P | 2.4 | <b>CAC</b> | H | 1.4 | <b>CGC</b> | R | 3.5 |
| CTG              | L              | 1.1              | CCG        | P | 1.4 | <b>CAG</b> | Q | 3.0 | CGG        | R | 2.2 |
| CTT              | L              | 1.1              | CCT        | P | 1.1 | CAT        | H | 0.8 | CGT        | R | 0.3 |
| ATA              | I              | 0.0              | ACA        | T | 0.5 | AAA        | K | 0.3 | AGA        | R | 0.3 |
| ATC              | I              | 3.5              | ACC        | T | 1.1 | <b>AAC</b> | N | 1.9 | AGC        | S | 1.6 |
| ATG              | M              | 1.1              | <b>ACG</b> | T | 3.5 | <b>AAG</b> | K | 4.6 | AGG        | R | 1.1 |
| <b>ATT</b>       | I              | 5.4              | ACT        | T | 0.5 | AAT        | N | 0.0 | AGT        | S | 0.3 |
| GTA              | V              | 0.5              | GCA        | A | 1.6 | GAA        | E | 1.6 | GGA        | G | 0.5 |
| <b>GTC</b>       | V              | 4.3              | GCC        | A | 1.9 | <b>GAC</b> | D | 3.5 | <b>GGC</b> | G | 6.0 |
| GTG              | V              | 2.4              | <b>GCG</b> | A | 3.3 | <b>GAG</b> | E | 4.3 | GGG        | G | 1.6 |
| GTT              | V              | 1.1              | GCT        | A | 1.6 | GAT        | D | 1.1 | GGT        | G | 1.4 |

<sup>a</sup> Triplicate codon.

<sup>b</sup> Amino acid residue.

<sup>c</sup> Frequency of codon usage (%).
