# Supplementary material for: Engineering an efficient and tight d-amino acid-inducible gene expression system in Rhodosporidium/Rhodotorula species
Source: PubMed Central journal article supplement (PMC4624585; doi:10.1186/s12934-015-0357-7), 2015-10-26
Supplement: 12934_2015_357_MOESM5_ESM.pdf [file 12934_2015_357_MOESM5_ESM.pdf]

actgacgacctcttccgtcgcacgcagtaccgccccctccctctcgaatgtcccccaactcgatcggcgtaacctacgacacctctccgtccacgcacc  
aaagtactgccagtaacctcgcgaggggattacagaagcttggcgcgacgtttgagagacggacgggtcacgtcgggtgagcaggcgttcgaggggggtgatttgg  
tggtcaacgctacgggtctcgggtcgtcgtacfftgtctctatcgctcaagcagcttactaacagtcctctcgcaggcgccaagtcgattgctggcatcgacgacc  
aagccgccgagccaatccgcgggtcaaacctctcgtcaagtccgctgcaagcgtgcacgatggactcgtccgacctcttccccgcgtatatcatcccac  
gaccaggtggcgaagtgatctgcccggggacgtacggcgtggggcattgggacttgcctgcaaccctgagacgggtccagcggatcctcaagcactgcctgcg  
actcgaccttccatctcgcgacggcacgatcgagggtatcgaagtctccggcacaacgttggcttgcgacctgcgagggcggccccgcgtcga  
ggcggaaacggctcgtcctccctctcgcaccggtccaaatgccccctcgttggcaagggcacgacaagggcggcaaaaggagaaggaggtgacactcgtgca  
tgcgtatgggttctcgcgcccgggtaccagcagagttggggcgcggcgaggatgttgcgctgcttgcgaggaggcgtccagcgggtaccacggcgtgca  
agggagtcaagctgtaggcggaggctgagtgctgtattggggcatttaccaggttcggcgc

>Seq2 [organism=*Rhodotorula glutinis* ATCC 204091] D-amino acid oxidase gene, complete CDS

ggaagacatccccctcttctcgtcagattgccgtctcctgcaagggcagcagtgggggcgtcgggtgcgtgcccaactcgtctgaagtggccaatggctgaca  
gtgctcccgcaggtcacgacgctgccccatcctcgcggcttctggcagcggaaagcttattcttcttgcctctcgttgtacaatcgtcgtcgtcggcatttgc  
ttgttgatatccctagccttgccttccatactgaacaatctacaactcgtccttctcgcgcccggaaagcgttcagcacctcgttctgcacgttctcggcaagtact  
ccccaccggctcgtcccacatcaccggcagatctgcccgttctatactgctggtgagggcaggttgcgagggcagagagcgtggaccgctcgtacttctt  
ccattacgcgaaggaggttcccggcgaatcgtctagtgcttccgtccatcctcgtcgaacaactccgcaatctgcagagacgaggtagtcagcacatg  
tcatagctgaagaagcaagcgtatgcccaccaagttcggaaacttcgacgcgtcctcaagccccctcaacactcgcagcgcataaccgtcaaaagtcagaccgagacc  
gacgtgcttctcggcagacggaggcgtatgactcgtatgatcggcgacacggatttgcgtggcgttcgtagggtcgataaaggaagggtagaagacgacca  
ttctcgcgagacgcgaaggtcagccgaaacttctgacgacaggaagtaacgtcgtacgcacacgatgccgtggttctgtgctcgcctggcccgatcagctgaa  
gaacttctctgggacgttctcgggggtgctggtatcgtcgcgcccagagtgcgagaagatgacggggcgaacgctgagttcaggggctgctcgaatc  
gtcagctaaagctcgaaggttgaagcgcggtgcgcacgtcgcagcatggtctgatcgttgtgctgagaggtcgaccatcatgccgagcctgttcagctccgg  
tacaagctcgcgcccgaagcgggtcagcccgttcccgtcgtgtacaggctcgtataggagagcccgtccccggcggaaagaggcgaaggtgtgagaaaaacc  
gtcaacagagcgggaagaaggccgagaggtcgcctcgcctcacaagtgtggcaggtgtcgtgagcgtaaaggtaccgcacgccgagttgctgaaagaggcgtg  
ggatggccagcagttcatcaggtgatcgcgagctgtaggaagagcgggttagcgggaggtatgctggtagagactgttcgtaaaacccctctagcccataag  
gacgcgatcttcccctccgcgaacgcaactccgcacctcgtcccccgttcgagcgcacatcctcaggtataggtcaccatccgatgaataaggtcgcagc  
ctctcagtgcccactcgcaccgcttctgtgggctcaaggaagtctccccctcgggtcgcgtatcacacggagcatacgaacatggaacaagcctcctacgcg  
tcttgcgcaacttcgggaggtcgcacatggcctgcaagaccggctcgaagttcagggaggacgtcgcagcgggtcctccggcagaggtggcgcagcgcagtaggg  
gaggtcgcagcttctatgagtggtggcgttccaggatcccgcgggctcagcgcagcaaggactcgttgggcaaaagtgaaggtgactgatgagcgggtg  
cgaggccgcagagcagcgtcgcgacgacgggaagcttggcagcagcatgactgtgagtagtagccaaggagaacagcgcagagtcggcagggaggcgcac  
atggaggcagagcgtggggcggaggagcagatggggagtcgcgtgggggacgagaggggtccgctcgcaccaactcgtctcttctgcttctgctgcttgc  
tactgctcgaacgacgccatgattcacagaagcgcgtcgttctcctcggatcagggcgttgccttctcctcctccccacaccgacagttctcagggaggag  
tacagcagcgcagcagggctgccgagggggatctgggtgacgcagcttctgattatacagtgattggcctgagcagcgcctcctcctcgcctggaagggtac  
agcgtgcacattgtggcccgcacttcccggaggacgtcctcgcagccagacttctcctcggctgtaggtcgtctcgtcgggctcctcagatgctcctgtga  
gctgaccacttccatgtgtgacgcagggcgcgaactggacgccgttcatgtctctcacggacggctcctcgcacaagcaagtggggaagaattgacttctgcttcc  
ccttctgtctcttttctactcgtgtaaccaagctcgtgctacacagcaagaagtgggtcgcagcttgcaccgaccggcaggtcatgtggctcaaggggacgag  
gcccgttcgcgcagaacgaggtggttgcctgggcattggtacaaggacatcacgccaacgtgggttcaccgtagttctgctcctcaacctcaccaggtc  
actgacgacctcttccgtcgcacgcagtaccgccccctccctctcgaatgtcccccaactcgatcggcgtaacctacgacacctctcctccacgcacc  
aaagtactgccagtaacctcgcgaggggattacagaagcttggcgcgacgtttgagagacggacgggtcacgtcgggtgagcaggcgttcgaggggggtgatttgg  
tggtcaacgctacgggtctcgggtcgtcgtacfftgtctctatcgctcaagcagcttactaacagtcctctcgcaggcgccaagtcgattcgtggcatcgacgacc  
aagccgccgagccaatccgcgggtcaaacctctcgtcaagtccgctgcaagcgtgcacgatggactcgtccgacctcttccccgcgtatatcatcccac  
gaccaggtggcgaagtgatctgcccggggacgtacggcgtggggcattgggacttgcctgcaaccctgagacgggtccagcggatcctcaagcactgcctgcg  
actcgaccttccatctcgcgacggcacgatcgagggtatcgaagtctccggcacaacgttggcttgcgacctgcgagggcggccccgcgtcga  
ggcagaacggctcgtcctccctctcgcaccggtccaaatgccccctcgttggcaagggcacgacaagggcggcaaaaggagaaggaggtgacactcgtgca  
tgcgtatgggttctcgcgcccgggtaccagcagagttggggcgcggcgaggatgttgcgctgcttgcgaggaggcgtccagcgggtaccacggcgtgca  
agggagtcaagctgtag

>Seq3 [organism=*Rhodotorula graminis* WP1] D-amino acid oxidase gene, complete CDS



tccggtacgagttcgcggccaaatgcagttaggccattcccgtcatgcacaggctc gataggagaccatgccggcggaagaggcaaaggctgcgggagca  
ttgggtcagcaagctaaccgaagtgaaggactggatccgctcacaggtgtggcaggtgtgctgagcgtgaggtatcgacccaagttgctggaagagtcgca  
ggatggcgagcagttcatcaggtgatgggagctgttcgcaagagccagtcagcgggacgaagtcgggatagactgttcgtgcacaccctccaagccaataag  
cgacgcaatttgcctccgcaaacgactccgcacctcgtccgctgtccgagcagtgccatctcttcaggataatgctcgaccatccgatgaatgaggtcgaca  
ctctcgagcggccactcgaccgattcgtcggctcgaggaaagtcctctcccgtcgggtgcgcatcgaggagcatacgcgacatggaacaagcctctacgcc  
tctcgcagcagtttcgggaggtcgacatggcctcgcagggccggttgcgagttcagggaggacgtcgagcgggtcctccgggagaggtggcgggacgtagg  
gaaggtcgacgtgtccgtc gatgagtggtggcgtttcaggatcccgcgggcttcagcgagcaaggagtcgtcgggtaaagtgaaggtcgactggtgaagcgitt  
gcaagcccgcagagcagcgtcgcagcagcgggaagcttcggcacgagcatgagtgatgaatgatggtccaaggaggacagcgcagagtcaacaggagggca  
catggaggcagagcgtggggcgaggaggcagatggggagtcgctgctgggggacgaggggggtgctgctc gactaacgctctctatcgtcttctgctgctt  
gtactactgaacgacgccatgcactctcagaagcgcgtgttgcctcggatcaggcgggtcgtcttttccctctcctcccacaccgacgtcctcgacgaggt  
gtaggacggcgagcaaagctcccagggcgatctgggctgactgagcgtc gagtgtacagttatcggctgagcagcgcctcatcctcgtcggaaagggt  
acagcgtgcatattctcgcgcgacttccggaggacgtcgcagccagacttctcctcaccatgggctgtgctcgtctcactgtagttggaggatgtcagcg  
agagctgagcaatctcgtcatccccgagggcgcaattggacgccttcatgacgcttacagacggctcctcgacaagcaaaatgggaagaatcgactttgtcgc  
tctcttctacctcattcttggcctcgagctgacgagtgatgatacacagcaagaagtggtcgagttggctccgacgggcatccatgtggctcaaggggacg  
aggcgggtcgcgagaacgaagacggcttctcgggactggtacaaggacatcacgcaaatgtgcgccacattcacttctccttccatgctcctgcttact  
gaccgcccctcttccgctgagcagtagcccccctccatcttccgaatgtccacctggcgctatcggcgtaacctacgacaccctctcctccacgacaaa  
gtactgccagtagcttgaagagagctgcagaagctcggcgcgacggtttagagacggaccgttacgctcgttgagcagggcttcgacggtgcggatttgggtg  
caacgctacgggacttggatgtcccgaactcccctctctactcgaatttctgattgatgctcgcagcgcgaagtcgattgcgggcatcgacgaccaagc  
cgccgagccaatccgcccgaaccgctcctcgtcaagtcctcagcagatgcacgatggactcgtccgaccccgcttctcccctacatcattccccgacc  
agggtggcgaagtcatctcggcgggacgtacggcgtgggagactgggacttctgtcaaccagagacggctccagcggatcctcaagcactgcttgcgctc  
gaccgaccatctcgcagcagcgaacgatcgaaggcatcgaggtcctccgccacaacgctcggcttgcgacctgcagcagcagggcggaccccgctcagggc  
agaacggatcgtcctcctcgcaccggacaaagtcgcccctctcgtcggcaggggcagcgcacgagcggcgaaggagaaggaggtcacgcttctgcatgc  
gtatggcttctcagtgccggataaccagcagagttggggcgccggaggatgtcgcgcagctcgtcgcagagcgttccagcggtagccagggcgccgc  
gggagtcgaagtgtag

>Seq5 [organism=Rhodospiridium toruloides NP11] D-amino acid oxidase gene, complete CDS

aagacatcccgtcttctcgcaccaatagccgccctcctgcaaggccaacagtggggcatcggttacgcagcgcctgttcgtgacttgcctgtgccattcgtga  
ctaagtattcgaggtcagcagcgtccgccaatcctcgtgggctattgcagaggaagctctgattctctcgcctcctcctgggttctccgatagtcacgctcgcag  
ctgttgttgtagtactcctagcttgcctcgaattgaacagctcacaactgctcttcttgcgcggcggaagcgcctgagcacctcattctgcacgctcctcgggaaga  
tactccccctccggggcccacatcaccggcaaatctgtccgcttctcgtacacggctggagagggcaggtcgcgagggcagagagcgtcggaccgctcga  
cttttccatcacgcgaaggaggtgccgcccgatcaagtccgctaggtcgtcttccgtccagcctcgtcgaacagctctgcagctcgcgacacaagcttctcagc  
attccatcgagggcgggagagcgaaacgacgcgcaccaagttcggaaacttcagcgcacctcaagcccctcgcgctcgcagcgcagcgcagcgcagcgcagc  
cgagaccgacatgcttctcgcagacgggtggcgatatactcgtatgtatccgcgacgcggatgtcgttgcgttcgcttagggctgatgaaggaggggtagaag  
acgaccatcctcgtcggcgggctcaggaagtgtcactcatgaaagaagcaaggcgaacgtacacgatgccgtggttggctctcgcctggcccataagctt  
gaggacctcgtccgggacgttgcgaggatggctcgtggatcgtctcgcgccggagtcgagaagatgacgggtcggcactgagctcagggcctgtagcc  
aagtcgtcagcgaagtctcggaaagtgtgcagcgaagtgcgcacatcgagcatgtctgatcactggtgtgcgagaggtcgaccatcatccgagcctgttcagc  
tccggtacgagttcgcggccaaatgcagttaggccattcccgtcatgcacaggctc gataggagaccatgccggcggaagaggcaaaggctcggggagca  
ttgggtcagcaagctaaccgaagtgaaggactggatccgctcacaggtgtggcaggtgtgctgagcgtgaggtatcgacccaagttgctggaagagtcgca  
ggatggcgagcagttcatcaggtgatgggagctgttcgcaagagccagtcagcgggacgaagtcgggatagactgttcgtgcacaccctccaagccaataag  
cgacgcaatttgcctccgcaaacgactccgcacctcgtccgctgtccgagcagtgccatctcttcaggataatgctcgaccatccgatgaatgaggtcgaca  
ctctcgagcggccactcgaccgattcgtcggctcgaggaaagtcctctcccgtcgggtgcgcatcgaggagcatacgcgacatggaacaagcctctacgcc  
tctcgcagcagtttcgggaggtcgacatggcctcgcagggccggttgcgagttcagggaggacgtcgagcgggtcctccgggagaggtggcgggacgtagg  
gaaggtcgacgtgtccgtc gatgagtggtggcgtttcaggatcccgcgggcttcagcgagcaaggagtcgtcgggtaaagtgaaggtcgactggtgaagcgitt  
gcaagcccgcagagcagcgtcgcagcagcgggaagcttcggcacgagcatgagtgatgaatgatggtccaaggaggacagcgcagagtcaacaggagggca  
catggaggcagagcgtggggcgaggaggcagatggggagtcgctgctgggggacgaggggggtgctgctc gactaacgctctctatcgtcttctgctgctt  
gtactactgaacgacgccatgcactctcagaagcgcgtgttgcctcggatcaggcgggtcgtcttttccctctcctcccacaccgacgtcctcgacgaggt  
gtaggacggcgagcaaagctcccagggcgatctgggctgactgagcgtc gagtgtacagttatcggctgagcagcgcctcatcctcgtcggaaagggt

acagcgtgcatattctcgcgcgacttgccggaggacgtctcgagccagactttcgttcacatgggctgtgctgctcactgtagttggaggatgtcagcg  
agagctgagcaatctcgtcatccccgagggcggaattggacgctttcatgacgcttacagacggctctcgacaagcaaatgggaagaatcgactttgtgcg  
tctccttacctcattcttgccctgagctgacgagtgatgatacacagcaagaagtgggtcagttgggtcccgacgggcatgccatgtggctcaaggggacg  
aggcgggtcgcgcagaacgaagacggcttgctcggcactggtacaaggacatcacgcaaatgtcgcgccacattcactcttccctcgcacgtctccgttact  
gaccgcccctcttccgctgctcagtagaccgccccctccatcttccgaatgtccacctggcgtatcggcgtaacctacgacacctctccgtccacgcacaaa  
gtactgccagcttgaagagagctgcagaagctcggcgcgacgttgagagacggaccgttacgtcgttgagcagggcgttcgacgggtcggatttgggtgt  
caacgctacgggacttggatgtccgaactgccccctctacctgcaatfttctgattgatgtcgcagggccaagtgcattgccccgacgacaccaagc  
cgccgagccaatccgcgccaaccgtcctcgtcaagtccccatgcaagcgatgacgatggactcgtccgacccccgttctcccgcctacatcattccccgacc  
agggtggcgaagtcatctcggcgggacgtacggcgtgggagactgggactgtctgcaaccagagacggctccagcggatcctcaagcactgcttgcgctc  
gaccgacctctcgcagcaggaacgatcgaaggatcagagctcctccgcccacaacgtcggcttgcacgtcgcagcagggcggacccccgctcagggc  
agaacggatcgtctcctctcgcagggacaaaagtcgccccctcgtcctggcagggcgacgcagcagggcgaaggagaaggaggtcacgcttgtcatgc  
gtatggcttctcagtgcgggataccagcagagtggggcgcggcggaggatgtcgcgcagctcgtcgcagggcgtccagcgggtaccacggcgcggcgc  
gggagtcgaagttag

>Seq6 [organism=Sporobolomyces roseus] D-amino acid oxidase gene, complete CDS

ttacatcccttggaaactgttcaagaagcgcactcgggtacaagaacaagcaactgatcaaaactgtcatactgaaccgacccctcgaacgtaccatcatcctcg  
aactgacccctcgcatttcaactccaaccgagaacggaatcacgttgaaccgtggttgggaacgaagggggacgacgctacgacgagagagttgatcgcc  
atgattcccttttggaaagcgttggcgggtcaaaggcgtcaaggatgtccgacccgtgatcaagtttacgagggtaaacacattcctacggcgtactatgaagcaga  
gttgaggggcaagagagaattggaagacaagtggacaagggaaaagacggacaatagttcaaggttggatttctcctcttgggtgttgacaaggtataac  
ttttctcttctctgatgtctgtttcttttttggaggaggagaagtgtgattccaccctctctctctctctcgaacacgctcctcctgctttagactactatg  
cgagattctgctccagagacggacgttgaaaaagttcgaagtcggcacaanaagctctacctcgcagcaaaaagtactggaaagacaacgaagggtcatcaa  
caagcaaatcgaagaagacaagcaacgtcaaatgaacgagtgagtcttcttctctctcggaatgaggggcatctcttgacaggattgactctgatttctcctgg  
ttgtgtgtataaacaacagagatgaggagtcttgggtgggaatgatcggattagttcctcctactcctcctcggcgcctcactgcataaatttctgtctccc  
cccctcgtctgtttgatcataaatgtccccttggccccctcctcctactactgcaaacctcggaggaagggttgcattacctcttttgacattatctgaactg  
aaaaagccccctcctacccctagctatcaagtattgaactctcagggcgaaggaaagagacagagatagagagcagagcagagggtgtcggaggagcgc  
cttggattgactagtaggaaggtgtcattgatcgcctcgtctcgttggcggagaaaggaggggggtgcccgtctgcgcgcgtggggcagcggatgaacgaacga  
aactgttggaccgccaagccggaacaaccaagtttccggtcgcgccgaagatcctcctcgtcgcgccgaacgaagaagggaacgagtttttagtcagctct  
atgttgatcgtctcgggaggtcgcgaacgtggttccgtagaaaagttaggtcagatctggccttgttcttctcgcctatgagagaggaacaatgagaacctcgc  
ccttgatctccaactggtccccactcattcttctccgattcctctagagacgcacactcggaggagagggtccttgagagagaggaagagagcagggcgg  
ttgaatgaaggacgacaaaagacgagatctcagattgttcgagagagtggtgtgtaattgccgataccattctgttctatattgctcactctgactttgggtatac  
gctgccgacgctagcgcgctagagagagcgcgagagagagagaatgctcacttttgggtcatcaacgcaggaggtatcagatggttgcgttgttcttctcgcg  
atcaaacctcatgctcagtgacgagggaccgaggaacttgaagaaggccgtacgagagtagctcgcgttctcgcagcggagatcgaaacgatgcaaacctg  
atcgcacggggaaccggcgcgtcagctcgcacacagttggaagagtagaccaccagactcacaatgttgcggaggttgggtagagccatgttccagagtga  
ggaatccgaggacaaaacgatcagcttgcacttgcacttctactcttcttccctcgcacatcgcgctgagcctcagagagtagtctgactaggcgc  
caggaggtatgtagcaacggatttccactcggctactcccagggtttcctccccacttgttttagccgcaaccgacctctccttctcgcgctgactctgctga  
tgactcgcagggaaactcggacagtcattgcaacttgcgcccttctactcgtcgaacaaggctacacgggtcacggttgcgaagagacctccggaagacacc  
gactctaccgcttgccttctcctggcggcggcgaacgtatgtccattcaagagctcgcaggaagggtccgagagaagcgcagatgggaaaccgtcactttgtca  
gttgttacttgcctcctcctccccagtgaccgaaactctctcattcgaacttttgcacttcccacttttctagcaaaaaacttcaaccatgatccatctggcttgg  
ccatgactctcaaggtactcggaggttcgcacagcaagaatcccagttgttggccactgtacaagacgtcgttccgaacgtgagcttttctcctcttcttctc  
ccccgacctgtaactccgtctcctctgagctcagctcgtcgaagcaaatfactcgtgtgttctgatctcgccttgtgtgagttgattagaccgacacttga  
tcgcgaagaatgtccaccaatgcatcggagtcgaatcgcataccatctcggtaacgcaccgaaatattgctactacctcgcagagttgaggtcaaagggga  
gtcacgacgagaggaggtacgtcaagctattgaagaggttttcgagaaacgttggagcgcgagaacgatttctcgtcaatgcgactggattaggtactatfttc  
cttcccgactctctctctctctctctctctctctctctctctctctctctctctctctctctctctctctctctctctctctctctctctctctctctct  
tcaagaagtgcagaccgattcaggtcaaacgtcttgcataaacggttgcgtcgggtgtacgatggattcagtggttgcagtttcttctcctataccctt  
ccccgaaacttgcgttgcattcaatcgtcaataacgttctgtgtcgggtttcttcttctcagatccaacctcttccgcttacctatcctcgcactggaggtg  
aagctatttgcgggtgctcttaccggtgtacgtctgtacgttttccctctctctctccgaggaatcaagtcaccaactcttcttctcttcttcttcttctctc  
gtcgcagaggtggacgactgggactgtcggtttctcccgatcatcgaaacgtatactctcactgtctacgactagaccttcgatctctcgcagatggtaccctcg

aaggcatcgaatcttgaggcacaacgtcgggctgagacctctaggagtctggaccgagagtcgaaaaggaatcatcgagctgaaccacgaaaagagtc  
gattcggatcgggctcgtctcgacgatgcgaccaaggggaagagtgcaagacacgtggagtggtgtacacgcttacggagtgaggaccggcgggatacca  
gcagagttggggaatcgacaagacgtcgtcaagttgatacaagaaggagaagcagcagagaatccaagtgtag

>Seq7 [organism=Puccinia triticina] D-amino acid oxidase gene, complete CDS

gttggtcgtcgcactctctcgcgctcgcagctgatccggacgcggctccaatcaacaccggtagcccggcgcagctgctccggttcgcccgttcgaccgaa  
cggccgggggtggcgtggcgagtcgcgcccgatactggcacgctactaagctcagtcgctcgcagggctccgaactctctacacaggactccagcgacg  
ctgtggcgggatgtgccttttagcgcctttactggctcctacacagggctcccgcagggatcctcagcgggtggactcggcttcggcagggctgatagtcgggta  
gctccaccagcttgcctccagagcttctcgcggctccctcagcggcgtgtcgcgctactctcactaacccttcgacgtcgtcaaaaccgcagacagg  
cttcccctactcgccttctcatctcccactccaaggccccctgggactatccgtattatcctcagatcgtcgtctgaaggcattagaaatggactcatgag  
aggctctcgcggcggtggctaaagtatccccggctgtggaatcatgatcgtacgtcctcacttctaactattactctacttttctgatcttcatggtctttgcctac  
tcgacaggctcgtatgaaggactcgtcaagctactcacaagctactagcttcaacacagagtttggacataactcgttctctaatgaccttcgcgattaccttcc  
atcctgctcatgcagatcacatggacatcttttctgtgacttgatgtaaccttcatcttttttggtaggggttcttctcttctcagcaggattgacttttcatg  
aatagactcatcatcatcgtaatftccatcgtcgatcgttcaattgctcaaccaactaatcgagcagtcataaacaataaaagtacatatctctttagacttctct  
caatttgttgcctcctctgtcttccaaagaaaaagaaaacagatfttacgcaaaaagaataaatgaacgctggtcaggttactgaccagcttaattttacttctt  
ggtttgtctaggatataatggtttgataagaactggccttccatagcatcacatggcgtatggtacaaattaccacaaccatfaaatctggtgctgtctac  
cgtagtaccacgtcagaaggaaaaggactgagtaagttgattatccactggctctgaaggctctgatccggacaccgcagatccgtcgaatgcggcaaccctc  
cagaccgatccgtatcgggacggagctgatgaaatctaggatccggcgtaaaagtgaggcttgggtaaacccggaaagccgcctcagatcggggattcc  
ttcggggaattctgggaatctcgcagcagcagcttattgttacttttggcaataaatcaaaaatagccacattgaaatccagttgaaatccgaccgattct  
ggatcagaccaggaggggtgcgggtaggtgatataatccagctccgaggcaccgattggacctcaaaatftattctggctcgaaggagacggcgatgga  
agcttactgtgtgatggctaccatcagttctccaccaggaagtgaggttggcaacagttcagccgatagcatatcatgcccctactgtatatactcttcagcacc  
gggtgtttaaaccctggtggaccaagcatggatggatgcactccatggttggatttgaagacatggttgaatataacttctcggaggaggttccccgctcctgc  
tgtgcaatcaggtgcctttatgtatftttaggaccatcctctggtctcaagccattcagttaacatctcatcaagtgccaccccaaggacatattatgccccacg  
aatctggtccttcaatcctcagttgctagtgatctctggctatgctcggccaccgagccaagaccgctgcaatgcaacgtcagtcggttactcgggt  
ctcacctgtgcactcagctcgcgaacagccgggtcaccatacgtgcaatgtggtcaccgcccgaagcgcgctgactgcatggtctcaagaccgctcagc  
aagctcccgggtggaaccagatfttgcctcccctggggcggtacgtgttcaaatgagacacatttcttcaattcatttccatttggcagagaaaaaaatattgagc  
cggaggaagaagtgacttgaccttcttctgattgcgcatgtagggtcttctggcaccctcactcctcaaccagagaccgagctcagaaaaaggtagccgg  
atgggagacgaagtcgttaagcatcttgggagattgctgagcaagatcctcgggtgcatggttagcggctcagacggctcaagccctccccatccacccctc  
caagatctgctgaaaacctcgttctcgggggctattgtagaagctgactcaagaatattatgaccatcgggtgactgaattaccgtggtatattgacctatgtcc  
ggaggtgaattatccgttggttatatactggacactccaatcttcaaatgagtaaacctgactgagagcgcacgtgattgaaaggctcgaataatgaacgacgaag  
aattagcgaaggcgcagaaaggaaaagtagatggaataatctgtaaatccgttcttgaaccaatccgttaccctggattacctcagaagcaactggtcaatac  
gaagtccaaatcattcaccatcgtctgaaaccgtctcggaggcttcttgggggatcccaagttggcatcccggcggcgaataatgtagtaaatgctcaggtct  
cggcgcgggcagcttgtgtgtgtcagacgaattgatggagccgattcgtggtcaaacgatcctcatcagggcccccaaccgatccaactaacacagggga  
tgacgataaatgtatctacatctcgcgcccacctaccatacccggcgaaggcgaagaggtcatcttgggtggctcatatgaacctggcaactccttattccat  
cgacaacggaatcgcgcataggatcttgaccgaagcgtcaagctccggcccgatcttagccgtgacggcacgtccaacggcatcgaatattggatcatattgc  
ggctttagggccagtcgcaaggatggtcctcgggtgaaagggaaaattcagatttcaagaagagaaactcaggtgaaactgggctcttggctcattgtt  
atggaattgggtaaafttctccctcgttgcctaacctggttaattccttagcaaacgggtgctcaaafttactccgtattacacttttgcattgatcagaggagg  
cttccaggtcgtgaaatgaaggcatttgaattctgctgagcgtaaagtgaagagcatctcatcgggtgatatttttctgctcccgtgcagctgaaaggcgagctac  
ggggcagcggcagaagtagaagcttgatagagactcagaaaaacatctcttga

>Seq8 [organism=Puccinia graminis] D-amino acid oxidase gene, complete CDS

gtatctctgtatcactttccattatgtccattgtggtgtgtttgattgtattccaggattacagtttctatagttgttctctgtctatacaatgaatgtcctcccaggtat  
aatcttcaattgagctaaatctattagtttaagttgactttaccgttttagccatgtaatgtcttggctgcccagaaagtagcagacaattcagtgagttgagcta  
aaagttttagcaggatcagaagcacattctggagaaggcagatctgtgcaactgatccttcttcttttggaaatgagtgcttgatgggggtggttaaggtcagacatt  
gtattgctactggggttctagtttctgggtggcataactacagaggctcaagtgtaggcttggaaaatgaaagagatgacattgagtggttgggtgagatgggtt  
ggctctgattatctctgtgaccgctcaatgttgaaggtgagctgactgtggggaggggggcttctagcttatacaatcccctcgtccagagggcgggggaa  
ccccagcatccgggggcaccttgcgaagcgcagcctctgaaagaggagcttgggaggggaagtcggaatttggctggaagcttgggcttttggcttctct  
cctcttccattttaaaccctcattactactaggccatcccacaaatggttagcggaaaattcccgaagagctgagcacctcaccttgtgatcacttttttctac

atftttattaacaataatccatctgatggatgftaagtggggcaccagatcccagctcaaaagcagctaatacacatataatgtggtacaacacatagattagccttac  
agtttagcataggtatgtgtacacacagaggtatgtagccataaatgtgtacagaaaaagtattgggcaagatcaaggaaatccgtttggtgaaactggaatactgtc  
atcaaaactcccaagaaaatgtccattttcaaggggggtggggcccaataaccggcctgtgtacacagaaaagatagagaagatctgggggatttt  
gtctgtctaaaagcagagattcattccagtggaagggagggaatggtggaggaaacttttccctatcaacagctcccagctgcacacaaaaacacagacc  
ttcagggcaagtcctctctttggaggggtgcccgggtctttgcaccagcctgatctcagccctccgattgaggggctgtggttaggaatcaaaaaacagggattt  
gtatacaacagcatttgatccagtttgatgtgaatttcagacctgattctgttctggagggttttcttagacaggagcacagttcacaagtggcttttctttactgg  
gttttgacctgcacaggtctttgagggcagtttgaacccccctattggggttaggtggtgaacaggaatgatcttttactttcaaaaaatcatagaaggggaaccaa  
gctggcagatgaggagatgagaccactgccaatgaaagcttgctcaaaaagttaactctgctctgagccaggtcgcaggcctgtagagcattataaggcta  
aggagccagggccttaacaataatccatcactgcccagccattgcatgtgtcccaacaaaaattggctggggagttgtgatgtgaagtgaggaagg  
acttggttaagtcaggctcggctcgagaaacagccgactcgtaactccattggcattggatgagttgatagtggaatggccagtgctcatgggtccagtgaaat  
cgattgatctctcaaaagaaatcttaaatattagcctgaagaaacataagcatcactgctcacttaaaatcatcttaacaagtcattcatatgaattctacccccctg  
aatctgatcgggtgagccgccagatctctgtcatgtccaatgtcaacgtcatcgatccgggtgttctggcctcacctgtgctctcgagctgcacaaacagccccgg  
atcacataaccgtgtcactgtggtgaccgccgaaaacgctatggctagatggtctcaagaccgctccacgaagcttccagtgaggcccgattttgcttctcttggg  
cggtatgcataaatagactttcgggtcatcagttgaaatggaaaaatgaaaagtgtgaacagggtaaaagaacattttctgatctcgggatgttctctaaatt  
aggggcgtttcttccaccctcactccacaaccgagaccgagctacagaaaagggtggcctcatgggagaggaaagtcgttaagcctcttggggagatcgctg  
agcaagatcttcggctgcatggtcagcgggtctcagacgggtaaaactctctatcttcatctccatcaacacgtgctgaggttcttcatctcggtggtactagaa  
aacgactcaaaaaagtattacaacatccggtgtccgaattaccgtggtatattggatctgttccagaggtgaaagaatcattggatgcgctagattctctctacgc  
aagtgaactgacttgaggctaaacatttctactggaaggctcgaaaaatgaacgccgaagaatagcgaatggaccgaaagaaaagtcgacggcctgatctgc  
aatcgggtgacctgaaccgatccggtaacttagattactctgacaacaactagccaaatgatcgtccgatcattcaccatcgtctcgagaccgctactgagggc  
ttttgagggccatcccagtgctgggtctaccggcgcaagatagtgatcaatgctgtggtctagggcgggcaagatagggggcgtgctggacggaaatgatg  
gagccgattcggggccagaccatgctcatccgccccctcaaccgctccaactgatcacacgggacgacgagaaatgatctacatctgttcccgctcaccaccg  
atccccgggagaaggcgaagaggtcgtctgggaggctctatcaacctggcgactcctcattggagatcgtatgacaaaatctctcataggtatctgtccgaggcac  
tcaaaatcagggccgatctcagccatgacggcacgggttaaggcgctcaaatagtggaacatgctcgggctgagacctataataagaatggcctcgtgctg  
aacgtgaagattccacattaaatctactagtaaggagagactcagaattcaactgggatattggtccattgttatggaatcgggtagtcttctatcgtctacctcc  
tctcaatcaaatgatgaattaaattgacctcttctgctcacaatctttgtatcgagcaggggaggaggattccaagtgaagtgaatcaaaaaagaccgtgttct  
tctgtgacctctgttgaacttgggattagctcttcttctgctgacatattcctggtattttgtttgaaaggcaagctatgggggttcagaagaagtgagaatctagt  
agaacaaggccggtcttga

>Seq9 [organism=Melampsora laricis-populina] D-amino acid oxidase gene, complete CDS

ttcttgatcactcagtcacaaacgctctaaaactaagtttaaggccttttaaaaaaggccaacgtactccgacgctcataacctcttttttctgcaccaacggttc  
ttcttagtctctgcctgttctacttgcttggtaagttcaacggctgttttagcagtcattatggagttttcgcgaaagaatccatagctaatagagaaaaactc  
tcacatccaggtacacaaaaacaaaaaagaatggaagatgatctttttcatcattcggacctgacagtcataagaaatttaagcaaaattgagtgattgcaaac  
tgtgaaccacctctagaggtggtcgcgaacttataacttaaaatftaaagcaccgaaacataaaatftaaaagggtgtaaaagctcttcttgaacc  
acctattggtaaagctctgttctttgctgtattgctgctacttggtttacaagccagctcattcagttctatgcctttgtggccttgttccaataactgtggactggtg  
ttcttagacatttcaaatgtgtatctggattaggatccgctggactgtatattaatttggcatalcattatgacacctgattatcactgaaaatggaagggcagtagga  
gttggcttagtacttcaaatagattgctagatcaattggctgctaataagtaggccaagcaacttggttcatggtgtgaaaggctgttgttacagacaattgctgggct  
gggctaattatcttggttaccaccactgcacccattcctcttgagtaactgagcctcagtgaaataactgctttcaacttttctcatcaatttctacaggg  
atgtgctttgatgctgcttcttgtgtctctgttgaatattcactatgcactttgccatggtgctatfaggtaggcacattttgtttggttctctgatgcaagtgact  
gagctggtgtagtggctgctttatgaatgtccctgggtgatgttgggctggtgatgagttcattttgacaaaaactctgttgggtgggtatctgaggatgtaat  
ctttcaggatcaagttgtgtgatgtctccgcttgaacctatgtaaggtgtgagatgtgtagtggcttcttctttgaaagtgactttgaaagcttaacaaat  
aattcattttctgcttttctctttctgatagctgtttactttcatgttgcagttatgtgtctgggggtgggcatctggctgtagactacccccaaaagtaggctctct  
ccagtagggctctggggaaaggtgggaggccatataaaagttgaggattgtgttccaagagcaccactatggtgtgtaacaacatgatttagggctcagctctct  
gctaaaatacagacaggtccactctagacctgacttagacctgcggtccatacaactttgtcaaatcttgaccctgctgttcaaatctacaaccactacaacttga  
ttatagtaggaactaggtaaagcagatgacctagtggttcatgtggttaccacttaggtaaaacatgatgttcaaatfttgcgttgaggaaacgcaaaatftac  
gatcaaacactcttaccatagtgattcttaagagctattgagtggtgctggaactgtgatagcgggtatagcaaaagcgcgacttgagattccaaccaatct  
gagcggcccggtactcgggtctgcgactttcggctcacgggagttatccgctcccaagctcaggggtccggggaacattcggaaagtcgtcgtctttggac  
atccgtggcatacagggcgacataccattacgctgtcggcacttgacactactgacttcttagtcgaatcgtcgaagcgtgatagatcaat

gagcttcaatccagagcataagagcgagcacttgaatatcatcggttcaggagctctcggtctcacttgcgctctagaatagcgaagaaaaaggacgttacact  
ataacatcatcactgcggatgccgattcatccacttgggtccaccatccggtccacaaaaatgagaaaagtcgccgaggactttgcttcacctgggcagttgagtaa  
acctcatcgaacaaaatctgtactcctgcctaactttcgttcaagttttgcttgaacttcaaggggcgcataatggcaatcattttagcgcactagagatcctaagacg  
ttcaacgaaaaaagattacaagattgggagaaaaactccttcaaagaattatggaaaatctcagagacggacaatcaattgtgatggtgaaatattgattcttggag  
ttctcagcccaagggatgtgttcgttgaacatctcaacactattccagcaaacggattgtcacgaatattttagaagaacttagtgaccatgagttaccttggtaga  
ccgatttgtgccagaggtggctaaagtcttgcgattcaattatccaggtaaacaaaaagctaattggccactaccctcaatcccaaccacaagttcgacgact  
aacctcatcagagcttgaagtctgccccgccccgacaagcagggatttcaatcaagacgatctcactcaatccgatgatgtatcactttctgcatactcaattat  
ccaagatgggcttcaatcgttaccatcgttgaactcgttgcgggaagccttcgaaggcaataacactcttcaattccgcgcgctgacatcgtcatcaatgcgt  
caggtctaggggctgtacttacttgggtgtagaagacaaatctgtacatccattcgtggccagctagtcttagtcaaacacctcagccaatattttctcagaag  
agattctcaaggaagacttacatctctcgtcctccgttgaccggagattgacgaggaagtaatactaggagggtgctaccaggctgataatttgacttca  
gttgaacccgatctgactaatcacattctgtgtgagcttccagacacggccagacctaagtagtgatggtaccctacaggaatacatgtattgaaagaggttga  
gcgcttagacctgctagaaggatggagctcgaactttaggttagagaaagtcgctatttctggggaaaaacaagcatgctgtacattgctatggaattgggtacgtccc  
ttgtctatttagtggcaaggctccatacactttctatgcacccctcaagtgaattactgctgacccatgtcttgccttctacagtgggtgctgggttcagtaaga  
gatgcctctctttcatggccctttgtcctccgaattaccatattttctcgttgggtgcgaaacaattgccactattttctcctcagtaagttatggtatggcaca  
ggaagcattgggattgattaaggcacttcgagagggctgggaaactgtttaa

>Seq10 [organism=*Rhodotorula minuta*] D-amino acid oxidase gene, complete CDS

ttcacattgcctcctcctgctactccaccgtgcatcgtatagcctgctcgagcacgtgaaggtattttcactctgatcaaatagggcaagcttgttggctgcttga  
tgatgattcgtgcgagatggtgcaactccagcgttccctcttctcctcttgcactggcactaccctccacgtcctcttgttctgttggctgactactacctgttca  
cggagggtctcgtactgtggaactcgtgactcggatttggctgttgcgtgctgcgacaacgagatgggaaggtcgcagaagtctcgttattggagatgct  
gtattgctggtacttctcctctgttggtaacttagcgtgtagctgctgttgccttattagatgatagattgctacttgcggttagcgggtggcctgggtgggtg  
tgtgtacaaggaagtcagctattatgcgtacttctcaatgcaatgcgagctgaactgtaagtcctactgtggatctcctactgcactcttacgcttctcctctg  
ttttagtacccttgaaccgtacaaagtaattagagctgttggcagttcagtggtgaaataggtgtacacgactcactcgaagtcaggccttgatgcacgcatct  
cgagcaaggaaaaggactcctggacttttaggcacgcatcttgcatttgcggtgactgagcctgttttcgatttcattgatgaatgacgttccgaagttga  
agtgtagatttcacgtaggtatggtatggcagcggaggatcggagggtcagcatagatcgggtagtgatcagcaccgttcacgcagcaatgagccgatta  
aatataagaatccaccacaagcctgagcaccacgctgtattggcctctgcagcttctcgggtccttgcgttgcgttgcgccgcgctgaagaaggaccacctca  
ggcgtactgctcgtggcatttgcctcattgactgatccatcgtctgttccctcaatagatccctcttctccttgccttgccttgccttgccttgccttgc  
tgaggatgttgcctcctcattctcctggaatgtcgtcttccatgctaccttccgatcgtcttctccttcttcaaacgcagcgcagagctagctgactactact  
cttctggatcaggtctcttataataatgaacgcttcaaaagcatgctttataccccgggtactacgggtgatggtgatgatcttctcgggtcatcaagagaaga  
gccgctcagaatgactgttcgaaagagagtaactcggcatttggagaaatgacacacattcacaagacaccgacttttgccttctgcccagcaataaaca  
actacaggtatacatctgcatttaactgcaatgatggagtgagcagcagctcaacaatgccaatgcaggccatcgaagtcgcgctaccgcagctccaacgc  
cagcttgaagatcacgagaacgtttagtcagagctagatagggcaccgtgctcctctgaggccatgcagaccttgaagacttttagcagctatataacctgcct  
catgctgccttaggagcccattgctcctccgtacacaataagcgggttctcgcctcagacctgactttggaagacgtatgccactattccgctgggtcatccatg  
tgggcgccggaaaaaccacacgatgcaagcgtgcgagcagaatgtaatacaagccagattgctatacttacgagtaaaagccgatccgctagctgtgcgag  
cgaccacgcagaatgtcaatgcttcaagataagctatcttggcttcttagcaggccgatcgggcgtctcctcaacaagtcaaacggaccggaagcgataacct  
gcttttcttctcataaccacacattctgacaagcatgacgctaccacttctcgaagatgcacctcagcattggacgccgtcattatccggcgcaggcgtcactggcct  
cagtatcggactggagcttgaaaaagggttacaagattgcagtcgtagcgaaggacttgcctgaagatgatcagagctcctggcttgaagtcattgggctgtg  
aggagcttttctctatcgttctttgacatgcctactgacgcaactgctgtgacattgcaggggtgcaactggtgctcttcgaggtatgccctccaatctc  
cgaagattagcttcgggggacgcaaaaaaagatctcgcgaagatgcataagctgaagaagcgttcccttccccacttcttcttagacaacaacaagagag  
agcaagaatgggatcgtaaaacataccaagccctttaaactgtagctgaaaaccatccaacctatgcgaggtgagctaggttctgcttagagagagagatcacg  
tgggtacaaggacgaagtgtgaaggaaccgttcaatagtttatgatagctgactcttgccttggcttgcactacagctcattcagttccactcgtatgaaagcg  
acaagttacctgaacctgttcaaaagatctcgtgaaagatgtaagctacctgttttccgctacttctacgataaattggggaatgcaataagaaccattccgcaa  
gacagtagttgacgaagctataacctttaccctcgcgttctcaatgtcacctttcacatttctgaccaccatcagtacaagtcacgaaggagggcacgaaacca  
ggcgaagatgcataagctacaaatccttcatatgcacgcgcccaattatctacgtcacctagcgcagcagcttgcctcagcgggcttccgatccagcggaaa  
cgctgacatcgtcgaagaagcgtacaacctccttatacggccgctcaatctagtatcaacgctacgggtctaggtgctcgttctgactgggcaataagg  
atccaagcgtatataatccatcaggggacagactgtccttgcgaagctaccgagggatggaagaaaacctgcttcatgatggcgagcaccatccggacgag  
aagacgacgaaagatacggaaatcccagaaccgacttataatccgagacctggtccagagggacatgtagtactgtgagtgacgagcttacttcaatattgtg



cactcaggaagtctggtcttatgctggctcatcgtagaggaggtcattccaagtcaacaattgggaatatgcaccagactacgcattagcggaacgcattctgaa  
gcgtaactacgagttgtccctgaactggcaggtccaaatggaaaatcgtggaaagacagtaaggcttgattcctatgtgacagaattggtgttacgtactgatagc  
actttactatttctacagttgaaatcgtagcccaaatgtcggattcagacctagccgacaaggaggatgcaggcttgatctcagcctattgagctaggtaacgta  
aacaagaaggaatgcaactcgtcccaaatcgacaattaccgaacctaggactggagctatattgcatgcctatggaataggtagccacactcatctgcatcaca  
gtgtggtaaaatgctccactaaatactgatgttgcgttctcttttgtgtatctctgatacaaacgatgaaataggccccggcgattccaagcttccctcgatac  
ctctagaagctggagataggtcgaactcacttcaagaaggcgacgcgaagaagcgaagttcgaagctgtaa

>Seq11 [organism=*Sporobolomyces linderiae*] D-amino acid oxidase gene, complete CDS

gaaacgcgccgatcgcagccgagccggggcaccgcgtgggtgccgtcgcgagttgcgaagctccacggctcgtttgcctagcgtgtccagctctggcaagtct  
ggacctgctgctgcggacctgtcgcgcacgcctggctcgcgcactcgtctacgacgacgaccggacgcgggtcggttcacgtcagcttggtcgggctgcgg  
acggagggtcttgagggtcggggagcggacgtcggacgcgatccggggcggaccgggctggcttacaagccgcgcccaaagccgcgatccagct  
gcccagatccaggcgtcttgggctgtcacgcaatgtccgtgaacattgcagagcctggctgaccgcgacactcgtggagcagctgagtcgccgc  
atacggcaccgcgacccccgtcggcgcggcgtcgaacgcgtcgtcccagcttcggggcatcccgcgcatcgccgatctcggaccttctcgtcagccg  
gcatcaatcgtacgacgagtcggccgcccgtcgcggcaggtgcctttcccggggcctcgtcggcgcggcgtccccgcggcccgcagcgcggccggt  
cgagctactcggagctcagcagtcgcgaggagccggacgcgtggaggcgaccgcggacgcccagctgttccgagcggcggtgcttagctatctct  
gtcaactgacgccgcagctggacgacggcgagagctcggatggcattcgtcgtatggaccacagctcggcgcacggcaccgcgtcgcatttggccagacg  
ggccgatcgcacatcgcacatcgcgcgacgtcgtacgctcgtccgtccgatcggccgacacgtacttctcggcagcagccagggctccacggcgg  
cgtcgtcgtatgcattcgggtcagagcggcaagcgcacgacgacttgccttgcgccaccgttcggcctccagcgcacccgtcagccatcagccgacctc  
gaccggcgcgcttcgatctcagatcagccggccggcgcgatggagtaccggagtcggtcggctccgcagcgcgggggtattggccgagccgctc  
gttggccggagccatccggcgcagcgcgatgatggcggccgctgatcgcggccggcgtcggcgacgagcaccgtgccatcggcgtcgcattcgtc  
cggcggggcgtggacgcatcagcgcggccatcgccctacacgcatccgacggcggccttctactcggccattggcagctcgcctactcggccc  
ggcctcggccatgtcggcgtccgattcgaccacgtcggcggggcagacgcacgtcggcgcgtacgcgtgtacgcagtgccgaagcgttctcgtcgcgtc  
gttcttctcgcaacgctgacctcgcagtcggccctcttcgtcgcgattcaccagtacagccactcggcgagcgggtcgtcggcgatgcacggcgatctgac  
catctaggccctcgtctcgaagagtgccgtcgcggctcagcgtgcaggtgcgtttgcgtcagtgcttgcctgacccgctcagagcaatctcgtcgg  
cacggccgctccatcagcccaagtcgggctgccccttcggcgtcgcaccgtcagatcgtcagaggagcagactacgacaggatgaggacgc  
gatgcaggtgggatgaggcggcagcggcgctgtcaatggcgtcgtcggagcgaagttcacgttcgatcgtccattcgacgataccacgccaatctgtgtac  
aacacatgctcctccgttacctgtgactatatacaagtcttccacttgcacacttgcacgcggcccaagcttctcgcggcaaccggagcgcgcgagcgcgag  
cgagcttccgagtcacccctctccggcgtctcccagcagcagatggctcctcgtcctcctccacgtgtgctcgtcgcacgagcggcgctcggccgctc  
cgcgcgctcagctgacttggcagcgtcgtgggctaacgacggccgtggagatccagcgcgctcgtcctgaggggtcgcagtcgctcggcgtcccagctg  
aggcctcagccggcgtgaccatcttcggcgcgagacagccgaggtctcaagtcgacgcgctacaccagctcgtggggcggcgcgcatcacgtcacgtg  
agggccccggtctgcagcgcgactcgcaggtggacacgttcaaggcgtcctggcgctcgcgcacgacgatccgagcgtgcccgttgcgtgtgccacaga  
ccgaggtgctgtcaccggcggcccgttgcctcgcaccgacatcggctgagcgcgagctgtacgctcggcagccagctgacgccgatcaggtctcag  
gatcgtccaagccgacttcatcgcgaagaatcagctcgttcatcccagcgtcaagccgctcgaacctcagcgtcccgaaggtgcacagcggggct  
gtcgttacgaccatcgcgctcgcacacgccaatctgcccattggctcgcgcagcagctccgcggcggcggggaccgtcctcgtcgcgagctcggcaag  
ctgagtgacgcgctcgcagagttcgcgctcgtcaactgctcgggcttagcgcgctcagctcgtcggcgacgacagcatgtaccgatccgcggcc  
agaccgtcgtcgtccgcgcccgttgatccgttccggcatcagcgcgatccggcagcacaactggagtgcttgcgttccgttgcgtgagctgacgcgacat  
acatcattccgcgaagcagggcgacgtgattgtggcgggacacgcggcatcagcactggtcgtcggcgcgctggccagactgacgtcagccacga  
gcagcctcagccgaaacggcgtcggagatcctcgcgcggcctcaagctgtgcctcgtcgtcgtcccagggcgaagcggggcgtcaatgcgctcaggg  
acatcagctcgtggagcagcggctgtccgttccgtcgtcggcgcgctgacctcgcagcggcttccgaccggcgcgcaagcggcgtccgatcagct  
cgaccacgtcggcgcccagcggcgtcggcactcggcgtcgtgcacaactacggccacgctggcggcggctccagatgtcgtatcggcgtcggcactcgcgt  
gtggatcgtcGCGGTCTGCGCTCGCGTCCTGA

>Seq12 [organism=*Ustilago maydis*] D-amino acid oxidase gene, complete CDS

ttttacatataaaattataactaactagatgaggggtgagcaactgcgtgtggctcgtataggaagatgcaagctccacacacatccagaaacctgaccggtcgtta  
tgaccataactacacgaatgcaatgagagcaattgaaacaagcagcagatcagacaccaagttctctgaacctgtgatttggctgtgtgacggaagcaggg  
ataacctatttctgttacgatccgtgactgcatgcacagcgtcgaatcagcgtctgtcctcgttgggattcacgatttccgagaacgcactgtgaaactca  
ccactacacaattctgggtcacgatactcgtactaaatgcctggttcatcattcgtgattcgtatattgagggctcgtacacgcgagaaaaggggcttcaacc  
atcgattccactaacagcttctcagatcatcaagggttctccgatcgaaaagccaatctcccgatcattttagtttgcagactcctgttctctctcgtc

gtaactctgcagattgcatgctaaactatcatctggcattgcctgaacggatcatgatctggcaactcgatagctcgctcctcaaacgagcgcgcaaatgctgaccgc  
ctgtcagctcagcgacgttcgagacacctttagccacgcatcgcttttgaatcgtctctgtccatcaaattaccttgacacctttgccgacattctccgagatttcca  
gtggtatcagccgagcatcttctgtctggctgacaaaagtatgctactgagaacgagaaccactctcggactcgtcgcggggcagcaccactcgatgctgtgctg  
aacggaacattccggcgtccaaaactccatcgcatcgccacgttgaccacgatgcatcctttttagggcggaaatgtcaaccactggcccggctgacttctgact  
tgcagcccaccaacgtccttttgaagagtaacgtgcaggagccgtagtccgagtgagaaccagcacggatgctttagttgccgatgtgtagtagatgaatcgc  
aaacggcagtcggaggatgtaacagccgcaatcgatcatgctggccatgatgtgaatcggcaaaagtatctcgtaggcagatctatcgctccgcaaagcctg  
ctaaaactgtatcgagacaccttgcattttcgtatgaaggtcgcaatcgcttctcgatgctgtgacagtggtggcggtagcgtctgtaagggcgctgatactgctc  
ctcaactgtcgacgatcccccttcagctcgagagaggccagcaggtagaacgactctttgagatcgcttcagccttgcctttggatcaagacgctcttgcacat  
cgatgtgtagcccgtattgtattccggctctggtgctctggcgctcagcttccgactcatttaggaagaactcggcactttgactgaagagcagatcgatttctcct  
gggtgataccatggtgggtgaggtagaagaagccggcttgcagcagggatccaagatccgtgcaccgaggggtgctccagcgtcgtcgtatggagtgaatg  
ataggaatcggagtgcttccggccattctgatagcaaatgggttaaaactcagcggctccgctcggcctcgatctttggagaaaagtagaagagacagtcacgagta  
acacagtgacagcgatcaagcaagaacgttgagcaaacagaggttaaggtcccttggaaactgcgctttttagttttctgcctcaacaagcaactgtgccc  
ctgaatttccgggtgaaaagccggcctgatacggcagttaccaagccaatgagatcaattcagaaacacatatctccttggagccaacgtcgtcccaccatc  
gccacgctactactcgcgtacctcgcacgctactacctctgatcagcattgccatctagcgcgatgacaatcaacttcacgtagtgtcctcggcgtgagtg  
cttggactgaccgatgctttgagctgcgcgaacgcggctacagagtgaccatcctcgcacgcgatctaccttgcacttctccagaccttcgagctcttgg  
gctggagccaactggttctcgtactctcgacgacaagccagcagcgtcgagacgaaatcacgtttaagaaatggtcaagcttcacacgcgtttaccag  
aggaaagtaatggcaataatggagttaccgatatcggcctcaccagcgagataccaaggatgtatggttcagcaactgactcctgaattcagcgtcctgcccaga  
cgccgatgaaatgggagcgcgatgcaatcaagtacaaatctttactattagcgtaccgctgtacacgcgctggttgggtcggagttgacttcgaccaagccattct  
ccttgatgctacgcgagccgctccgagtagaaatccgacgatgctccacgtaaccagcttaccgctgtacgatcactcgtaccaggtcgtgatttggtagta  
atgcgacaggcgtaggagcggcagacttggccgacgtacgcgatcccaactctaccaatctgagcaaacggttcttatcaatgtaccatccttgcctcccc  
caatcgcgctgctcgtcgtttagaagctctccaagcccaacgcctactactcattccacgagcaaggtctgggcaagtcctcctgggaaagcttgaacttc  
ggcaatcaccaccacctgatcgaacttggcggaaaggatcatggaagagtgcgcaaagctggtgctgaaattgtaccggaggaaagacatgaaaga  
tatcgactgttttctacaatgctggcttgcagctgtaggggagaatggggctaggggtgagttgagaggtgggaggaaatgggtgacggtggtcattctg  
atggaatcggctccggcaggtatcaggctagtttggatcgaagggaggtggtgatctggtggataagcatgctggtcggcagctgagggctgtag

>Seq13 [organism=Sporisorium reilianum] D-amino acid oxidase gene, complete CDS

cgtcgcaatcgagcatccgctccgacatttgcgaacgctcaagatcccggcacttttctctcttggaggctggagtgtagaagagcagtatccaacaacagcc  
gcagccatcgagagcacgtttgacagcttctgcatcgattttcgggcgcttctcctcggctcgtcctcgcacgctcggctgcatgagccggcttctgagcagcgggc  
atcggctcgtacagacggctgcttgcctcattctcgttcaacgagtgcttctgtaggtgcgaatgatctgactgttggagcagggcgcgctcgtcatc  
aggaaacgacttgcactcgaccaccacgcagcaagctgaacagacgaagctctgtggttggctcgagactgacgaagaccaaggagtccgctgacgagctac  
tgtttctgtagattgttgcacgcgccatagccttgcgacagcggatgctcctgttctaaaaaaagcacactcgtagcctcgaacaacaagacctgaat  
gctcgaagcgtcttgcgccgatcgcagcggctgtgtcccgatcgtctagctcctcggcgtcgaacttctctttaggcaaacaccgcttgcggcagcgc  
tggcgggactccttctggtgatgcttctgaggttcggcattctgatactacaagtagcttgcgttcagacgggcacgcagatgctgccaccctgcaactc  
ggcagctcggcgcagcccttgcacgcatcttctgaaactcctcctcggctccatcaagttgcttgcacttttgcgcaccgcatccgagatccaacggaaac  
cagacgagcgtctcgtccggctggcagaagtagcgcgaccgagaagcgcgagaccgctcactctcgtacgagcagcaccacacgatgttgcgtcgcg  
gaacagtccagcgtccaaaactccatcgatcgcgacgttgaccacaatgcatccccttgcgggtggaatgtcgaccactggcccggcttcatctcgacttgc  
agcccgcgacgctcttggaaagcagcgtacacgagccgtagtcgaatgagaacctgcacggatgcttgcgtcgcagcgtcgtcgtcgtatagggaggt  
ggaggatagtgatgagggcgaatcgatcatgctgtccatggctgcgagtcggcaaaagtaccgcgagggcagatcgatcgttccgcaaagccggcaggatcg  
tatcgacagccttgcactttcgtatgaatgtcgcgagcactcttctgctcgcagactgtggggcgcgaacgactgtgacggaggtcgatagcgtctctcgcg  
ggagacgagcctcctccacctggccaggcccacgagatagaatgactccttggagtcgcttccgcttgcctcccgatccagccgctccgacttcatcggc  
tatagcccgtgttggcgcggcttggcattgtagccgctcgtgttccgcttctgagggaagaactgcgcctctgatcgaacagcaggttgcctcctcctggc  
ggatgccgtggtcggcaggtagaagaagcccgttgcagcggcgtccaagatccgtgggcccacgctgactcgtcgtcggccgggtgaggaggag  
atgattggaatcgggtcgcagtcgacatcttctgtgctgatgtgagggagcagagaagcgggacagaagcagcgcgaacagacgagaggaccttgc  
acggagcttatttttcttggctcgtatgaagagagagagacggcccgtgatttccggctgaaaagacggcgagaacgattgtcgggaccaatcagaaga  
agaaaagcgggactcgtacgctccgaccaccttaccatcatcatttgcgacccattcctcgcggagctcgatacatatacaaacactgcaagaatgaccgg  
acagtctcagctcgtggtgcttggagccggaggtaaacgctcagtagccagttgatgatgatcagcgaactcactcatttccgcttctcgtgttctcgc  
agtgtcgggctgaccgacgctttagctcgcgagagcagggctacaaggtcaccatcctcggcggatctcggcagactccttctcaaacgttccgac

tccttgggcggtgagtagcaaccacgacctcccaccagtcactcattgaagatcaccactgacacacctcacttttcaccgcagcacacagggagccaactggt  
gctcgttcgcaacgctcaccgacacaccagcccagcgtcgcgacgagatcacctcaaaaagtggctccagctccacacccgattgccaccgcaagtcatggcc  
atggtcgagttcaccgacatcagccccgtaagcgcgaagccaaggacgtatggttcagccgactcactcccaactcgcgcatccccgaaggcgacggtag  
ggcgcacacgcgacgaggtacgactcgttcacatcagcgtccgctgtacacgcagtggtggtctcggagctcacatccccgaagcccgtgctgttgacg  
cggcgcgagcaggaccgccggtcagatccgacgctgctcgcgctggtggcgtcgtggcggctgtcggctcgtggtgccggggtgcgacgtggtcgtcaatg  
cgacgggggtcgggtcgggctgatctggccgacgtgcgcgatcccgacgtgatccgatccgacgagacgggtgctcgtgctcgtaccggcgttcaagagcc  
ccaacaacggcgctcgggtcgtcatgaagctcggcagccccgcaagtagctatcccacgagcgcgggtccggccaggtcatcctcggcgggtcgtttgatgtt  
cgacagtccagcaccacgcccataaagcgtcggcgacaagatcctgcaggactcgcgaagctcgtcgggagatctaccggagggaagacgtggcg  
cgagatcgtatcctcgcacaatgttgattgaggccaggcaggacaatggagccaggggtggagctggagcacatccaaccaaggacggcgctgccag  
gttgacgggtggtccattcgtacggcatcggcggggatcagccagcttggcctcgcgaaggaggtggctgacttggtgacggacacctcgtcgtca  
agctcgattgtaa

**(c) Protein sequences of Daol**

Feature for Sequence 'Seq1'

gene 2001..3467  
/gene='DAO1'  
/note='D-amino acid oxidase gene'  
CDS join(2001..2040,2149..2261,2326..2396,2456..2573,  
2647..2848,2905..3467)  
/gene='DAO1'  
/EC\_number='1.4.3.3'  
/codon\_start=1  
/product='D-amino acid oxidase (Daol)'  
/translation='MHSQKRVVVLGSGVIGLSSALILARKGYSVHIVARDLPEDVSSQ  
TFASPWAGANWTFMSLTDGPRQAKWEELTFKKWVELVPTGQVMWLKTRRFAQNE  
LLGHWYKDITPNYRPLPSSECPNSIGVTYDTLSVHAPKYCQYLARGLQKLGATFERR  
TVTSVEQAFEGVDLVVNATGLGAKSIAGIDDQAAEPIRGQTVLVKSACKRCTMDSSDP  
SSPAYIIPRPGGEVICGGTYGVGDWDLVSNPETVQRILKHCLRLDPSISSDGTIEGIE  
VLRHNVGLRPARRGGPRVEAERLVLPLDRSKSPLSLGKGTTRAAKEKEVTLVHAYGFS  
SAGYQQSWGAAEDVALLVEEAFQRYHGAARESKL'

Feature for Sequence 'Seq2'

gene 2001..3467  
/gene='DAO1'  
/note='D-amino acid oxidase gene'  
CDS join(2001..2040,2149..2261,2326..2396,2456..2573,  
2647..2848,2905..3467)  
/gene='DAO1'  
/EC\_number='1.4.3.3'  
/codon\_start=1  
/product='D-amino acid oxidase (Daol)'  
/translation='MHSQKRVVVLGSGVIGLSSALILARKGYSVHIVARDLPEDVSSQ  
TFASPWAGANWTFMSLTDGPRQAKWEELTFKKWVELVPTGQVMWLKTRRFAQNE  
LLGHWYKDITPNYRPLPSSECPNSIGVTYDTLSVHAPKYCQYLARGLQKLGATFERR  
TVTSVEQAFEGVDLVVNATGLGAKSIAGIDDQAAEPIRGQTVLVKSACKRCTMDSSDP  
SSPAYIIPRPGGEVICGGTYGVGDWDLVSNPETVQRILKHCLRLDPSISSDGTIEGIE  
VLRHNVGLRPARRGGPRVEAERLVLPLDRSKSPLSLGKGTTRAAKEKEVTLVHAYGFS  
SAGYQQSWGAAEDVALLVEEAFQRYHGAARESKL'

Feature for Sequence 'Seq3'

gene 2001..3550  
/gene='DAO1'  
/note='D-amino acid oxidase gene'  
CDS join(2001..2040,2120..2232,2312..2714,2791..2895,

2960..3027,3110..3550)  
 /gene='DA01'  
 /EC\_number='1.4.3.3'  
 /codon\_start=1  
 /product='D-amino acid oxidase (Daol)'  
 /translation='MAIDKRVVVLGTGVVGLSCGLVLSRQGYRVHFIARDLPEDSTSQ  
 GFASPWAGANWTPFYSRDEGPRQAKWEEATFARWVSLVPSGLAMWLNDTRRYADTDAG  
 LLGHWYRDTVRNYRELPPSELPKGVAAGAAYDTLSVNAPLYCQALARELQTLGATFER  
 RSVSSIEQVFEGQDDIALVVNATGLGAKSIAGIEDSACHPVRGQTVLVKSGCKRCTMD  
 SSNPEAPAYIIPRPGGEVICGGTYLVDDWDLSPSASTAQRILTQCLALDPSISTDGTLD  
 DGIHILRHNVGLRPARTGGPRVEVGKLTLPVLRSTEPGTALALGTARPAPAGASSEAV  
 GAPSEAVKREVTLVHAYGFSSAGYQQSWGVAQDVLGLVEGEIGPPRAWWTQRGKL'

Feature for Sequence 'Seq4'  
 gene 2001..3461  
 /gene='DA01'  
 /note='D-amino acid oxidase gene'  
 CDS join(2001..2040,2150..2262,2327..2397,2454..2571,  
 2641..2842,2899..3461)  
 /gene='DA01'  
 /EC\_number='1.4.3.3'  
 /codon\_start=1  
 /product='D-amino acid oxidase (Daol)'  
 /translation='MHSQKRVVVLGSGVIGLSSALILARKGYSVHILARDLPEDVSSQ  
 TFASPWAGANWTPFMTLTDGPRQAKWEESTFKKWVELVPTGHAMWLKGTTRRFAQNEDG  
 LLGHWYKDITPNYRPLPSSECPPGAIGVITYDTLSVHAPKYCQYLARELQKLGATFERR  
 TVTSLEQAFDGDALVVNATGLGAKSIAGIDDQAAEPIRGQTVLVKSPCKRCTMDSSDP  
 ASPAYIIPRPGGEVICGGTYGVGDWDLVSNPETVQRILKHCLRLDPTISSDGTIEGIE  
 VLRHNVGLRPARRGPRVEAERIVLPLDRTKSPLSLGRGSARAAKEKEVTLVHAYGFS  
 SAGYQQSWGAAEDVAQLVDEAFQRYHGAARESKL'

Feature for Sequence 'Seq5'  
 gene 2001..3461  
 /gene='DA01'  
 /note='D-amino acid oxidase gene'  
 CDS join(2001..2040,2150..2262,2327..2397,2454..2571,  
 2641..2842,2899..3461)  
 /gene='DA01'  
 /EC\_number='1.4.3.3'  
 /codon\_start=1  
 /product='D-amino acid oxidase (Daol)'  
 /translation='MHSQKRVVVLGSGVIGLSSALILARKGYSVHILARDLPEDVSSQ  
 TFASPWAGANWTPFMTLTDGPRQAKWEESTFKKWVELVPTGHAMWLKGTTRRFAQNEDG  
 LLGHWYKDITPNYRPLPSSECPPGAIGVITYDTLSVHAPKYCQYLARELQKLGATFERR  
 TVTSLEQAFDGDALVVNATGLGAKSIAGIDDQAAEPIRGQTVLVKSPCKRCTMDSSDP  
 ASPAYIIPRPGGEVICGGTYGVGDWDLVSNPETVQRILKHCLRLDPTISSDGTIEGIE  
 VLRHNVGLRPARRGPRVEAERIVLPLDRTKSPLSLGRGSARAAKEKEVTLVHAYGFS  
 SAGYQQSWGAAEDVAQLVDEAFQRYHGAARESKL'

Feature for Sequence 'Seq6'  
 gene 2001..3749  
 /gene='DA01'  
 /note='D-amino acid oxidase gene'  
 CDS join(2001..2046,2174..2357,2440..2557,2682..2898,  
 2996..3100,3205..3272,3372..3749)  
 /gene='DA01'  
 /EC\_number='1.4.3.3'

```

/codon_start=1
/product='D-amino acid oxidase (Daol)'
/translation='MPTREPQRVVVLGAGVIGLTCALSLVEQGYTVHVVARLDLPEDTD
STAFASPWAGANVCPFKSLEEGPREARWETVTFKKLSTMIPSGLAMTLKTRRFAHEE
SQLLGHWYKDVVFNRYRHLNREECPPNAIGVEFDTISVNAPKYCHYLAHELRSKGVITIE
RRYVKSIEEVFRETFFGARNDVFNATGLGAKSIAGVEDQEVPRIRGQTVLIKSDCVRC
TMDSSDPTSSAYIIPRPGGEVICGGSYGVDWDLSPDPHAKRILSHCLRLDPSISRD
GTLEGIEILRHNVGLRPSRSSGPRVEKEIIELNHEKSPIRIGSRLDDATKGSASAKTRG
VVVHAYGVGPAGYQQSWGIAQDVVKLIQEGEARESKL'

```

Feature for Sequence 'Seq7'

```

gene      2001..3629
          /gene='DAO1'
          /note='D-amino acid oxidase gene'
CDS      join(2001..2210,2328..2453,2539..2610,2693..3363,
          3457..3472,3567..3629)
          /gene='DAO1'
          /EC_number='1.4.3.3'
          /codon_start=1
          /product='D-amino acid oxidase (Daol)'
          /translation='MSAPPSQEPPCIVNVIGSGVLGLTCALELAKQPGSPYRVNVVTA
          ESALTAWSQDPSTKLPVEPDFASPWAGAFWHPFTPQPETELQKRVAWETKSFKHLWE
          IAEQDPSVVMKADFKKYYDHRLTELPWYMDLCPARKMNDLAKAPEGKVDGIICKS
          VSLNPIRYLDYLKQLVKYEVQIIHHRLETVSEAFGLGDPKFGIPAAKIVVNASGLGAG
          SLCVSDDELMEPIRGQTILIRPPQPIQLITRDDDCKIYICSRPPTIPGEGEEVILGGS
          YEPGNSSLSIDNGIADRILTEALKLRPDLSDGTSTNGIEILDHIAALRPSRDKGPRVE
          RENFTISKKGETQDETGLLVHCYIGGGGFQASYGAAAEVRSLIETQKNIS'

```

Feature for Sequence 'Seq8'

```

gene      2001..3602
          /gene='DAO1'
          /note='D-amino acid oxidase gene'
CDS      join(2001..2183,2295..2420,2506..2577,2656..3332,
          3424..3439,3546..3602)
          /gene='DAO1'
          /EC_number='1.4.3.3'
          /codon_start=1
          /product='D-amino acid oxidase (Daol)'
          /translation='MSNVNVIGSGVLGLTCALELAKQPGSPYRVTVVTAENAMARWSQ
          DPSTKLPVEPDFASPWAGAFFHPFTPQPETELQKRVASWERKSFKPLWEIAEQDPSV
          MKTDFKKYYNHPLSELPWYMDLFPARKMNAEEIANGPEGKVDGLICKSVTLNPIRYL
          DYLRQQLAKYDVRIIHRLETVTEAFEGHPECGLPAAKIVINACGLGAGKIGVSDGM
          MEPIRGQTMILIRPPQPLQLITRDEKCIYICSRPPTIPGEGEEVVLGGSYQPGDSSLE
          IDDQISHRILSEALKIRPDLSDGTVEGVQIVEHVAALRPHKNGPRVEREDFHKIST
          SQGETQNSTGILVHCYIGGGGFQASYGVAAEEVRNLVEQGRS'

```

Feature for Sequence 'Seq9'

```

gene      2001..3585
          /gene='DAO1'
          /note='D-amino acid oxidase gene'
CDS      join(2001..2207,2283..2597,2770..3296,3397..3412,
          3514..3585)
          /gene='DAO1'
          /EC_number='1.4.3.3'
          /codon_start=1
          /product='D-amino acid oxidase (Daol)'
          /translation='MSFNPEHKSEHLNIIGSGVLGLTCALEIAKEKGRYTITITADA

```

DSSTWSPSAPPKIEKVAEDFASPWAGAYWQSFVATRDPKTFNEKRLQDWEKTSFKELW  
KISETDKSIVMVKYLILGLVLSPRDVFVETSQHYSSKPIVTNILMKNLVTMSYLGTPIC  
VQRLAKVFQAIQLCQMGVRIVHRLNSLAFAFEGNNTLQIPRADIVINASGLGAATLLG  
VEDKSVHPIRGQLVLVKPPQPICFSTRDSSRKTYIISRPSVDPEIDEEVILGGCYQAD  
NFDLSVDPDLTNHILCEAFQTRPDLSSDGTLQGIHVLKEVVALRPAKDGARLEVEKV  
VISGENKHAVHCYGIGGAGFQSSYGMAQEALGLIKALREGRETV'

Feature for Sequence 'Seq10'  
gene 2001..3866  
/gene='DA01'  
/note='D-amino acid oxidase gene'  
CDS join(2001..2177,2249..2273,2383..2468,2586..2654,  
2801..3222,3293..3420,3487..3657,3760..3866)  
/gene='DA01'  
/EC\_number='1.4.3.3'  
/codon\_start=1  
/product='D-amino acid oxidase (Daol)'  
/translation='MTLPLEDAPRALDAVIIGAGVTGLSIGLELVKRGYKIAVVAKD  
LPEDDQSPGFASPWAGCNWCSFADNNKREQEWDKTYQALFNVAENHPNLCELIQFHS  
YESDKLPEPWFKDLVKDYKVTKEGTPGERCISYKSFIMHAPNYLRHLAQQLRSAGVP  
IQRKRLTSLLEAYNLPSYGRVNLVINATGLGARSLGKNDPDIYPIRGQTVLVKVPQ  
GWKKTCFMMASDHPDEKTTKDEIPEPTYIIPRPGPEGHVVLGGSFQVNNWEYAPDYA  
LAERILKRNYELCPELAGPNGKSWKDIEIVAHNVGFRPSRQGGCRDLLEPIELGNAKQ  
EGMQLAPKSTITEPRTGAILHAYGIGPAGFQASLGYALEAGDMVDSYFKKGDAKKRSS  
KL'

Feature for Sequence 'Seq11'  
gene 2001..3328  
/gene='DA01'  
/note='D-amino acid oxidase gene'  
CDS join(2001..2043,2085..2135,2173..2372,2463..2847,  
2884..2947,2983..3114,3151..3328)  
/gene='DA01'  
/EC\_number='1.4.3.3'  
/codon\_start=1  
/product='D-amino acid oxidase (Daol)'  
/translation='MAPAASPRVLVIGAGVVGLTTAVEIQRALPEAAVTIFAAQTAED  
LKSTRYTSSWAGAHHTLEGPGLQRDCEVDTFKALWALAHDDPSVPLLVCPTQTEVFED  
ASKADFMKRNLSFMPDVKPLEPSALPEGCTAGLSFTTIALDTPNYLPWLAQRFRAAG  
GTVVRRELGKLSDAPLDEFDAVVNCSGLGALTLVGDDSMYPPIRGQTVLVRAPWIRSGI  
TRSGSDNWTYIIPRKQGDVIVGGTRGIDDWHEQPRPETASEILARGLKLCBALLPEAK  
RASMRVEDIDVVEHGCGFRPARKGGVRIELDHVAAPDGRSLPLVHNYGHAGAGFQMSI  
GSATRAVDLLRSALAS'

Feature for Sequence 'Seq12'  
gene 2001..3098  
/gene='DA01'  
/note='D-amino acid oxidase gene'  
CDS 2001..3098  
/gene='DA01'  
/EC\_number='1.4.3.3'  
/codon\_start=1  
/product='D-amino acid oxidase (Daol)'  
/translation='MTNQLHVVLGAGVLGLTDAFELRERGYRVITILARDLPFDSFSQ  
TFASPWAGANWCSFATLDDKPAQRDEITFKKWLKHLTRLPEEVMAIMEFTDIGLTRK  
DTKDVFNSLTPFESVLPDADEMGAHAIKYSFTISVPLYTRWLSELSTKPIILLDA  
TRAGPPVEIRRCSTLTSLSAVRSVPGCDLVVNATGVGAADLADVRDPNVYPPIRGQTV

LINVPSFASPENRAARCVMKLSKPNAYYVIPRARSGQVILGGSFELRQSSTTPDRNLAE  
RIMEECAKLVPEIVPEGKTKWKDIDVVSHNVGLRPARENGARVELELERLGGNGLTVVHSY  
GIGPAGYQASFGIAKEVADLVDKHAQRQSL'

Feature for Sequence 'Seq13'  
gene 2001..3267  
/gene='DAO1'  
/note='D-amino acid oxidase gene'  
CDS join(2001..2040,2119..2231,2314..3267)  
/gene='DAO1'  
/EC\_number='1.4.3.3'  
/codon\_start=1  
/product='D-amino acid oxidase (Dao1)'  
/translation='MTGQSHVVVLGAGVLGLTDAFELRERGYKVTILARDLPQDSFSQ  
TFASPWAGANWCSFATLTDTPAQRREITFKKWLQLHTRLPPQVMAMVEFTDISPVKR  
EAKDVWFSRLTPNFAVIPEGDGTGAHAIRYDSFTISVPLYTQWLVSELTSPKPVLLDA  
ARAGPPVEIRRCSTLASLAAVRSLVPGCDVVVNATGVGAGDLADVRDPDVYP IRGQTV  
LVSVPAPFKSPNNGARCVMKLGSPAKYVIPRARSGQVILGGSFQDVRQSSTTPDKALADK  
ILQDCAKLVPEIVPEGKTWREIDVI SHNVGLRPGRDNGARVELEHIQPKDGAARLTVV  
HSYGIGPAGYQASFGIAKEVADLVDGHLARQARL'

**Sequence S2. ACT1 gene sequences (Submitted GenBank sequence record ahead of release)**

LOCUS Seq14 2400 bp DNA linear 15-APR-2015  
DEFINITION Actin gene (ACT1), complete CDS.  
ACCESSION Seq14  
VERSION  
KEYWORDS .  
SOURCE Rhodosporidium toruloides ATCC 10657  
ORGANISM Rhodosporidium toruloides ATCC 10657  
Unclassified.  
REFERENCE 1 (bases 1 to 2400)  
AUTHORS Liu,Y., Koh,C.M.J. and Ji,L.  
TITLE Engineering an efficient and tight D-amino acid-inducible gene  
expression system in Rhodosporidium/Rhodotorula species based on a  
D-amino acid oxidase gene promoter  
JOURNAL Unpublished  
REFERENCE 2 (bases 1 to 2400)  
AUTHORS Liu,Y., Koh,C.M.J. and Ji,L.  
TITLE Direct Submission  
JOURNAL Submitted (15-APR-2015) Biomaterials and Biocatalysts Group,  
Temasek Life Sciences Laboratory, 1 Research Link, National  
University of Singapore, Singapore, Singapore 117604, Singapore  
COMMENT Bankit Comment: TAX: No, not new species/combinations; SEE  
ATTACHMENT.  
Bankit Comment: ALT EMAIL:hydrolase@gmail.com.  
Bankit Comment: TOTAL # OF SEQS:1.  
  
##Assembly-Data-START##  
Sequencing Technology :: Sanger dideoxy sequencing  
##Assembly-Data-END##  
FEATURES Location/Qualifiers  
source 1..2400  
/organism='Rhodosporidium toruloides ATCC 10657'  
/mol\_type='genomic DNA'  
gene <1..>2400

```

mRNA      /gene='Actin gene (ACT1)'
          join(<1..614,748..856,915..1022,1084..1656,1716..>2400)
          /gene='Actin gene (ACT1)'
          /product='Actin'
CDS       join(118..614,748..856,915..1022,1084..1656,1716..2357)
          /gene='Actin gene (ACT1)'
          /codon_start=1
          /product='Actin'
          /translation='MSSPPRFAPGSTSPTQSRPRATHSSPTQGPFPATPARPGASSAAH
          QPDPSTSTAGAASLLTSSPHYTTSLRSRHSLYGTEDRVVLDLGSRIWKVGFSGEPQPR
          ECRSVVSELAHERAGRRAGPSIGARGDDDEEDCFWALEKAEPSEEWLIREERVKRL
          RKIWFENLMIDPKTRKVIIVENPLLSTRVKEMIARVLFNQLQIPSLSFASAPLLALMA
          AGTVTGLVVDVGNLETTVLPVFHARPLFPSTTTTPRAGSRLNRRRLRSLLLAFGSYAPP
          PSSLSMTPPAIGRIPKELLTEELIEEIKTRLCFVGEEVPLDASRGEREASAFSGSAM
          SVDTASARDNFDDPSDPDNALLKELYSRFAATSTAKPVSFRIPNLSQPAIANGTGRGW
          IQVPGWIRERAAEVLWEEDGDGDERGLAAVVLDCLLKLPLDLRKPMASSILLTGGTAM
          LPGAFFPRFKAALLAQLDRSHPPSPPPSPPLPAASVEPPSSDPAGPMSDTAASPAPSR
          SSEVNAKRRRKHALATRLHNLRHSPRYAPLVPLARHLAILNHPSPNSSASSTAPSSTL
          ARQREGSAPSFSPALQSWIGGSLAGALKTGGPEIAREQWDAGLRFAEAEAEAEEGEEGEE
          FEEREVIRPALPDWTRIA'

```

```

BASE COUNT      413 a      828 c      696 g      463 t
ORIGIN

```

```

  1  tcctctggcc  tctctcgctc  cgttcgctcg  gccgcgcgcc  caaacgcgctt  tgttgacgct
 61  atcagcctcc  cgcgagcgct  agcaggctct  cttagccgcc  tcacgcctac  ctcgcgaatg
121  tcctcccac  ctcgcttcgc  gcccggttcg  acctcgccca  cgcagtcgag  gccgcgtgcg
181  acgcacagca  gcccaacaca  aggtcccttc  gcaacgcctg  cgcgccagg  tgcgagctca
241  gcggcgacc  aacccgatcc  ttcaacctcg  acagcaggcg  ccgctccct  cctcacgtct
301  tctcctcact  acacgacttc  gctgcgctct  cgacactcgc  ttacggcac  ggaagaccgt
361  gttgtgctgg  atctcggctc  gcggatatgg  aaggtcgggt  tcagcgggga  gccgcagccg
421  cgcgagtgc  ggagcgtcgt  gagcgagtgg  gcgcgatgag  gggctgggcg  aagagcaggg
481  cgcgccatag  gcgcgagagg  ggacgacgac  gaagaggact  gcttttgggc  gctcgagaag
541  gccgagccga  gcgaggagga  gtggttgatt  cgcgaggaga  ggggtgaagcg  attactgcgc
601  aagatctggt  tcgagtgagt  tcaaacggct  tttcttttga  taccaggact  tgcgctcgcc
661  aacctgggcg  gcgctttctg  ctaagaggct  cgagtacgaa  ccggacaagc  ggagtctttt
721  ccgccggctg  acttcgcttc  cccgcagaaa  cctcatgatc  gaccgaaga  cgcgcaaagt
781  catcgtcgtg  gagaaccac  tgctgtcgac  gcgcgtgaag  gagatgatcg  cgcgggtctt
841  gttcgacaac  ttgcaggtaa  gccatccgcc  gcttcgccag  gccgttcacc  cgtactgacc
901  gcttcgctac  gcagatcccg  tcgctcagct  tcgcttcgc  ccccttgctc  gccttgatgg
961  cggccggcac  agtgaccggt  cttgtggtcg  acgtcggaaa  cctcgagacg  accgttcttc
1021  ccgtgagttc  gccttcgct  ctgcctgct  tactaaactt  gcgctgatgt  agagctacaa
1081  caggtctttc  acgctcgccc  gctctttccc  tcctcacca  caactcctcg  cgcgggctct
1141  cgctgaacc  gccgctccg  ctctctcctc  ctgcattcg  gctcatacgc  acctcctccc
1201  tcctccctca  actccatgac  gcctcccgct  atcggacgga  taccgaagga  gctcttgacg
1261  gaggagctca  tagaggagat  caagacgcgg  ctgtgttttg  tcggtgagga  ggtcccgctc
1321  gatgcgagcc  ggggcgagag  ggaggcgtcc  gcgttcagcg  gatcggccat  gagcgtcgac
1381  actgcatcag  cacgcgacaa  ctttgacgac  ccttcgcacc  ccgacaacgc  actactaaag
1441  gagctttact  cccgcttcgc  cgcgacatcg  accgccaaac  ccgcttcctt  ccggataacc
1501  aacttgctcc  aacctgcgat  cgcgaacggt  acaggtcgag  ggtggatcca  ggtgcccggc
1561  tggatcaggg  agcgcgcgcc  cgaggtggtg  tgggaggagg  atggtgatgg  agacgagcgt
1621  gggcttgccg  ccggttgctc  tgactgccta  ttgaaggtgc  gcaagctgac  cacttcgctc
1681  gagcgaagta  gctgacactg  caccggttcc  cccagctccc  ccttgacctt  cgaaaagccga
1741  tggctcgtc  aatcctcctc  acgggcggca  ccgccatgct  ccccgcttc  ttcccacgct
1801  tcaaggccgc  tcttcttgcc  cagctcgacc  gctcgcattc  tccttcccct  ccgcttccc
1861  cgcctctgcc  agcagcatcc  gtogaacctc  cttcttcgca  cctgcccgga  cctatccga
1921  cggacacggc  ggcacgcctc  gcgcctctc  gctcgcgca  agtcaatgcg  aagcggcggc
1981  gaaagcatgc  cctcgcgact  cgactgcaca  acctcgggca  ttcgctcga  tacgccccgc
2041  ttgtccctct  cgctcgacac  ctgcctatct  tgaaccacc  atctccgaac  tcctcggcat

```



2101 cgtcgacggc gccctcatca accctcgctc gacagcgcga aggttcggct ccgtctttct  
2161 cgcccgctt gcaaagctgg atcggcggca gcctcgcagg agcgctcaag acgggcgggc  
2221 ctgagattgc gagggagcag tgggatgcag ggttgcggtt tgcggaggca gaagaggcgg  
2281 agggagagga aggagaggag tttgaggagc gggaaagtgat ccggccggct ctgccggact  
2341 ggacgaggat cgcgtaggat gatggtgtat cacgcgtgtt gccaaacag ttttacaggc

//
