# Supplementary material for: Engineering an efficient and tight d-amino acid-inducible gene expression system in Rhodosporidium/Rhodotorula species
Source: PubMed Central journal article supplement (PMC4624585; doi:10.1186/s12934-015-0357-7), 2015-10-26
Supplement: 12934_2015_357_MOESM6_ESM.pdf [file 12934_2015_357_MOESM6_ESM.pdf]

**Additional file 6. Sequence of the mutation promoter P<sub>DAO1m5-in1m1</sub> (renamed as P<sub>DAO1int</sub>)**

>P<sub>DAO1m5-in1m1</sub> (-509~+159, mutation was labeled in red font)

cgttcgtgggctcaaggaagtcctcccccgctcggctgcgcatcacacggagcatacgaacatggaacaagcctcctacgcgtccttga  
cgcaacttcgggaggtcgacatggcctgcaagaccggtcgcaagttcagggaggacgtcgagcggctccggcagaggtggcgagcgac  
gtaggggaggtcgacgtgtccgtctatgagtgggtggcgtttcaggatcccgcgggcctcagcgagcaaggactcgttgggcaaagtga  
aggtgtactgatgagcggttgcgaggccgcagagcagcgtgcgacgacgggaagcttcggcagcagcatgactgtgagtagtagtcca  
aggagaacagcgcagagtcggcaggagggcacatggaggcagagcgtggggcggaggaggcagatggggagtcgctgggggacgaga  
gggtgccgctcgaccaactgctctcttccctctcctccccacaccgacagttctcgaggaggagtacagcagcagcagggctgccgagg  
tcctcggatcaggcggtcgctcttccctctcctccccacaccgacagttctcgaggaggagtacagcagcagcagggctgccgagg  
gggatctgggttgacgcagctcttgattatacagtgattg~~ccatg~~
